# Supplementary material
Source: publisher figshare collection journal article supplement (https://frontiersin.figshare.com/ndownloader/files/23043410)

**Figure S1** Top three principal components of wheat genotypes in the GWAS panel after correcting for linkage disequilibrium using SNP markers filtered with  $r^2 \leq 0.2$  and  $r^2 \leq 0.1$ . Principal components 1 and 2 are shown on the left and principal components 1 and 3 on the right. Different colours represent Australian cultivars, inbred lines from CIMMYT and ICARDA and landraces from discrete regions of the world **(A)** Analysis using 2,941 SNP after filtering with  $r^2 \leq 0.2$  **(B)** Analysis using 1,142 SNP after filtering with  $r^2 \leq 0.1$ .

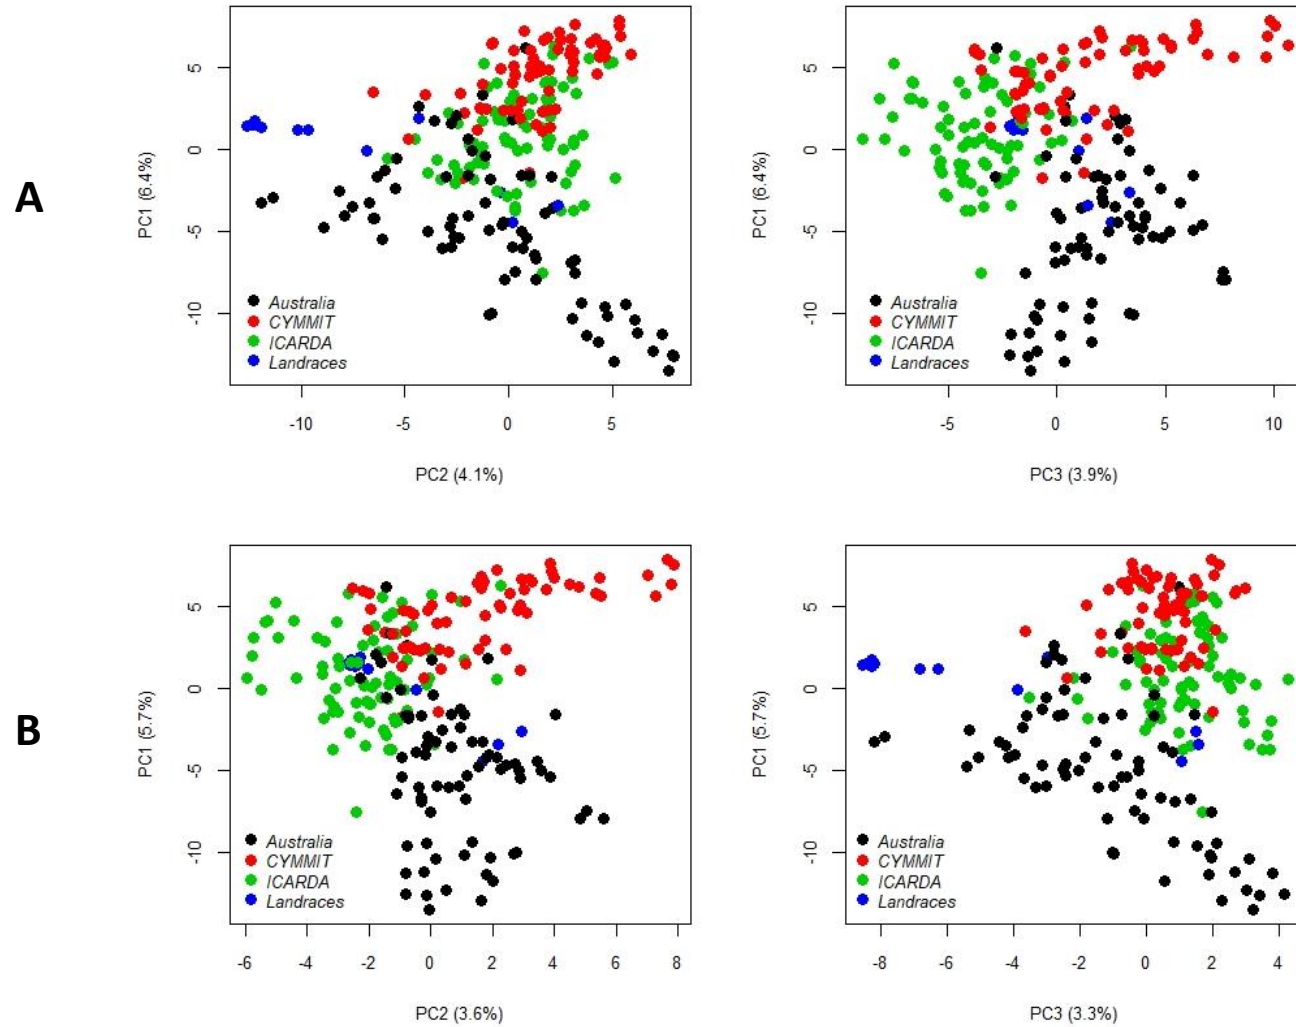

Supplement: Supplementary file [file 23043410]
